# Supplementary material for: Chemisorption and sustained release of cefotaxime between a layered double hydroxide and polyvinyl alcohol nanofibers for enhanced efficacy against second degree burn wound infection
Source: Royal Society of Chemistry journal article supplement (doi:10.1039/c9ra08355c), 2020-01-01
Supplement: c9ra08355c1.pdf [file c9ra08355c1.pdf]

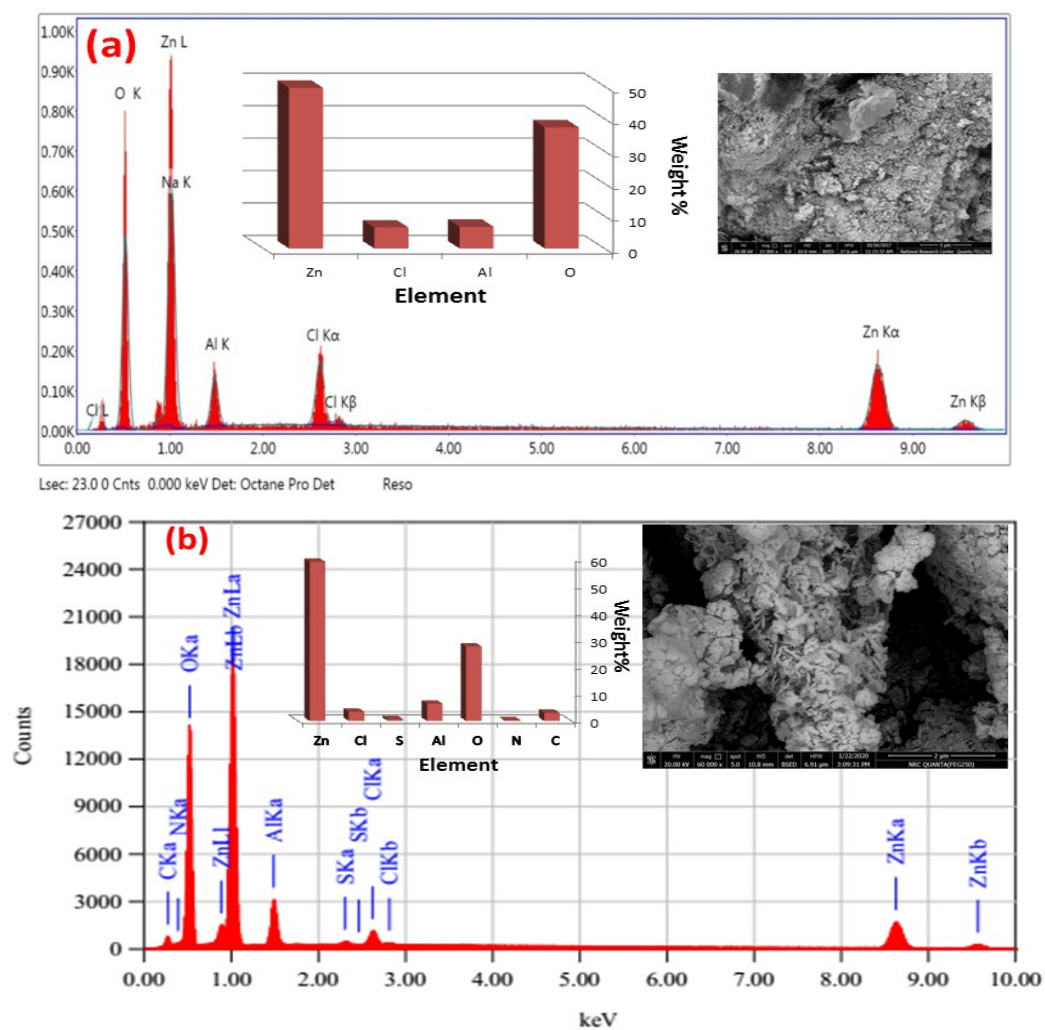

**Fig S1:** EDX of (a) Zn-Al LDH, (b) Zn-Al LDH/Cefotax.

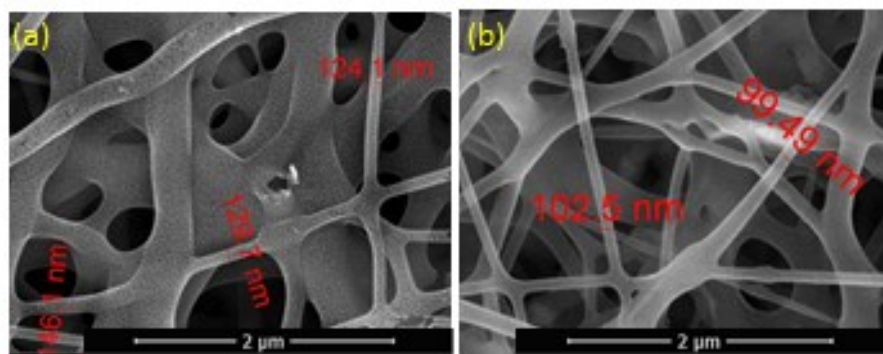

**Fig S2:** (a) Pristine PVA, (b) Zn-Al LDH@PVA.

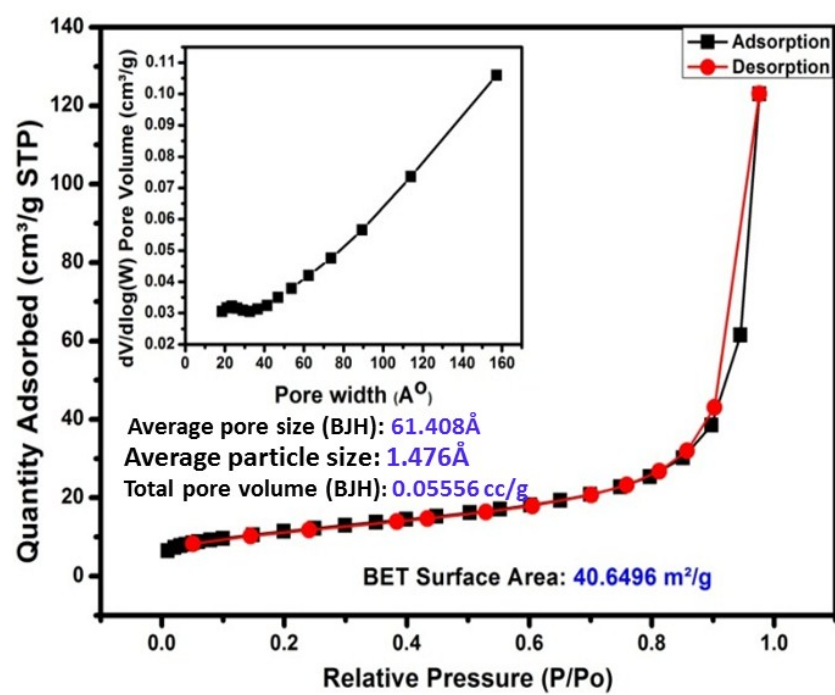

**Fig S3:** BET of Zn-Al LDH.
